# Supplementary material for: Donor–acceptor copolymers containing quinacridone and benzothiadiazole for thin film transistors
Source: Royal Society of Chemistry journal article supplement (doi:10.1039/c3tc00550j), 2013-01-01
Supplement: c3tc00550j.pdf [file c3tc00550j.pdf]

**Supporting information for**  
**Donor-Acceptor Copolymers Containing Quinacridone and Benzothiadiazole for**  
**Thin Film Transistors**

Hui Li,<sup>ab</sup> Chunling Gu,<sup>a</sup> Lang Jiang,<sup>a</sup> Lang Wei,<sup>ab</sup> Wenping Hu<sup>\*a</sup> and Hongbing Fu<sup>\*a</sup>

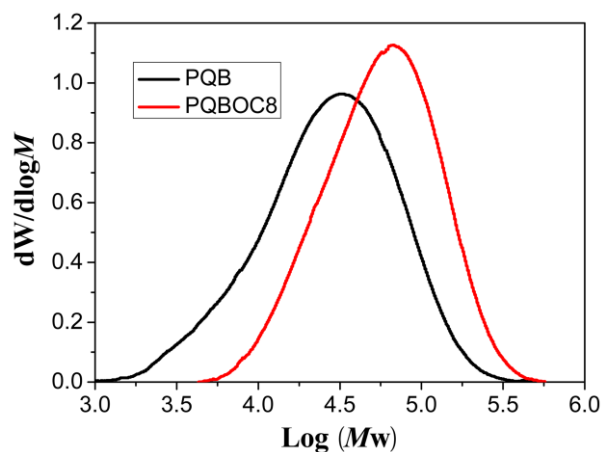

**Figure S1.** Gel permeation chromatography (GPC) traces of **PQB** and **PQBOC8**.

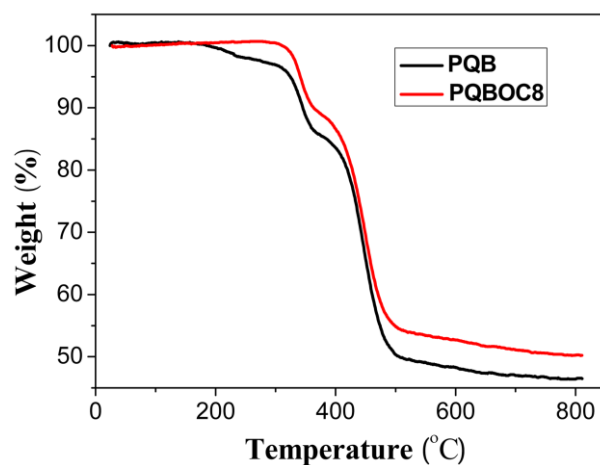

**Figure S2.** Thermalgravimetric analysis of **PQB** and **PQBOC8**.

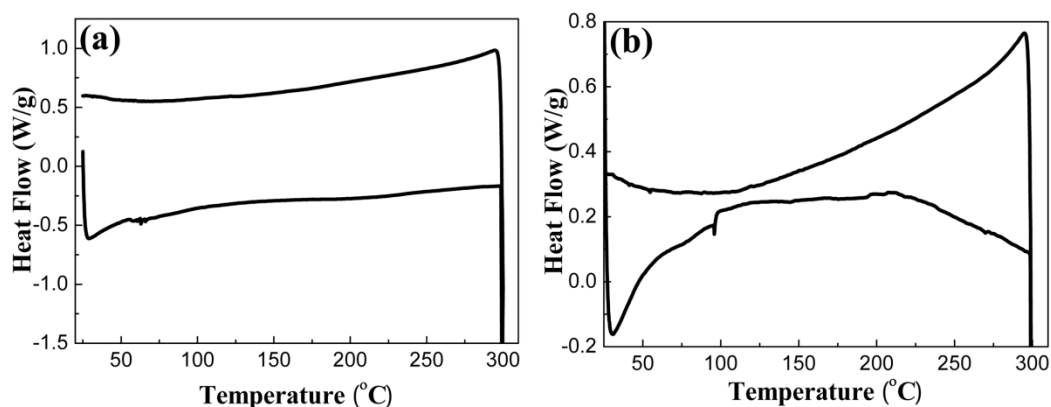

**Figure S3.** Differential scanning calorimetry thermographs of **PQB** (a) and **PQBOC8** (b) under nitrogen.

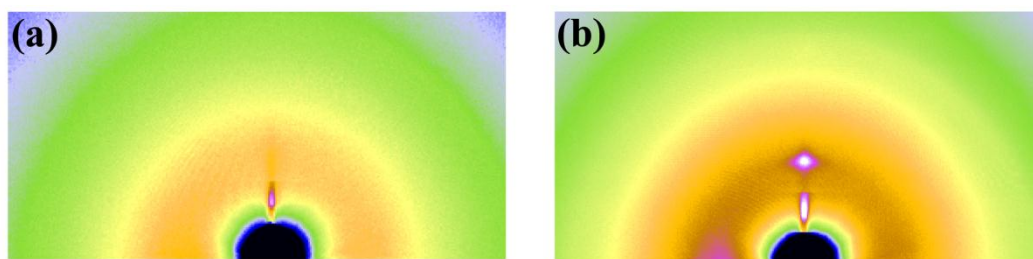

**Figure S4.** 2D-GIXRD patterns of **PQB** (a) and **PQBOC8** (b).

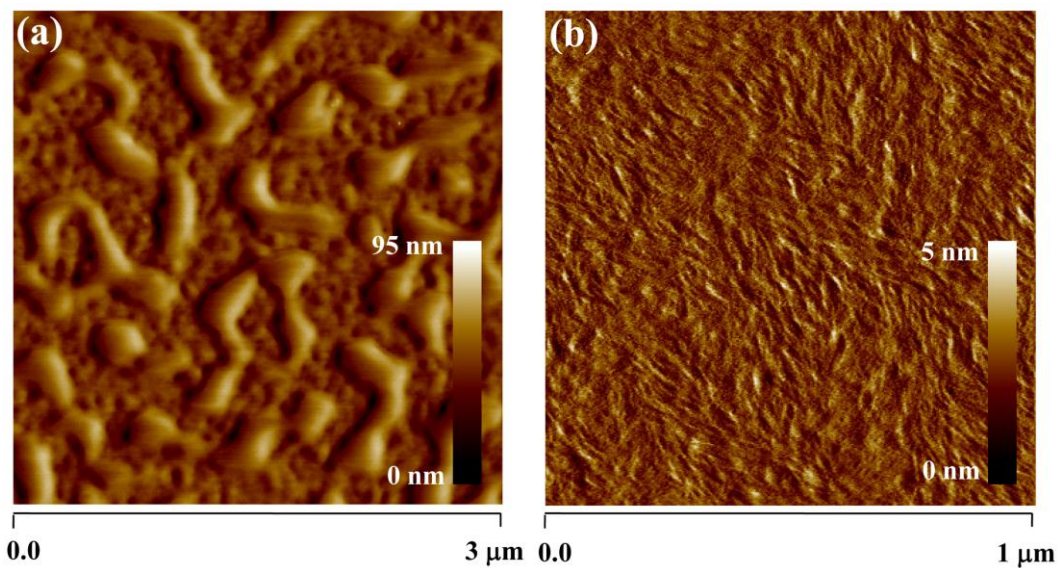

**Figure S5** Tapping mode AFM phase images of **PQB** (a) and **PQBOC8** (b) thin films annealed at 160 °C.
